# Supplementary material for: Nurses’ and Midwives’ Lived Experiences of Care Provision in Designated Healthcare Facilities for COVID- 19 Clients in Rural and Urban Settings of Tanzania
Source: Research Square preprint supplement (doi:10.21203/rs.3.rs-4570643/v1), 2024-07-04
Supplement: Supplementary file 1 [file fa9e7e0c48a6bbd4dd153345.pdf]

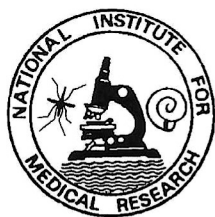

## THE UNITED REPUBLIC OF TANZANIA

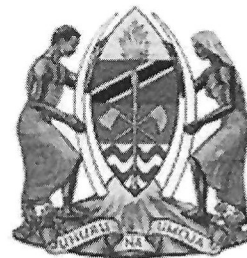

National Institute for Medical Research  
3 Barack Obama Drive  
P.O. Box 9653  
11101 Dar es Salaam  
Tel: 255 22 2121400  
Fax: 255 22 2121360  
E-mail: [nimrethics@gmail.com](mailto:nimrethics@gmail.com)

Permanent Secretary (Health)  
Ministry of Health, Community  
Development, Gender, Elderly & Children  
Government City Mtumba, Health Road  
P.O. Box 743  
40478 Dodoma

NIMR/HQ/R.8a/Vol. IX/3748

12<sup>th</sup> August 2021

Dr. Columba Mbekenga  
Associate Professor  
Aga Khan University  
School of Nursing and Midwifery  
P O Box 125  
Dar es Salaam

### RE: ETHICAL CLEARANCE CERTIFICATE FOR CONDUCTING MEDICAL RESEARCH IN TANZANIA

This is to certify that the research entitled: **Nurses and midwives experiences of care provision in selected COVID 19 designated facilities in Dar es Salaam, Pwani and Shinyanga, Tanzania (Mbekenga C. et al.)**, has been granted ethical clearance to be conducted in Tanzania.

The Principal Investigator of the study must ensure that the following conditions are fulfilled:

1. Progress report is submitted to the Ministry of Health, Community Development, Gender, Elderly & Children and the National Institute for Medical Research, Regional and District Medical Officers after every six months.
2. Permission to publish the results is obtained from National Institute for Medical Research.
3. Copies of final publications are made available to the Ministry of Health, Community Development, Gender, Elderly & Children and the National Institute for Medical Research.
4. Any researcher, who contravenes or fails to comply with these conditions, shall be guilty of an offence and shall be liable on conviction to a fine as per NIMR Act No. 23 of 1979, PART III Section 10(2).
5. Sites: Dar es Salaam, Pwani and Shinyanga regions.

Approval is valid for one year: 12<sup>th</sup> August 2021 to 11<sup>th</sup> August 2022.

Name: Prof. Yunus Daud Mgaya

  
Signature  
CHAIR PERSON  
MEDICAL RESEARCH  
COORDINATING COMMITTEE

Name: Dr. Aifello Wedson Sichalwe

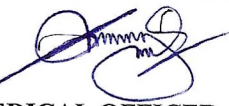  
Signature  
CHIEF MEDICAL OFFICER  
MINISTRY OF HEALTH, COMMUNITY  
DEVELOPMENT, GENDER, ELDERLY &  
CHILDREN

CC: Director, Health Services-TAMISEMI, Dodoma.  
RMO of Dar es Salaam, Pwani and Shinyanga regions.  
DMO/DED of respective districts.
